# Supplementary material for: Temperature-induced vesicle to micelle transition in cationic/cationic mixed surfactant systems
Source: Royal Society of Chemistry journal article supplement (doi:10.1039/c5sm01825k), 2015-01-01
Supplement: c5sm01825k1.pdf [file c5sm01825k1.pdf]

## Supporting Information

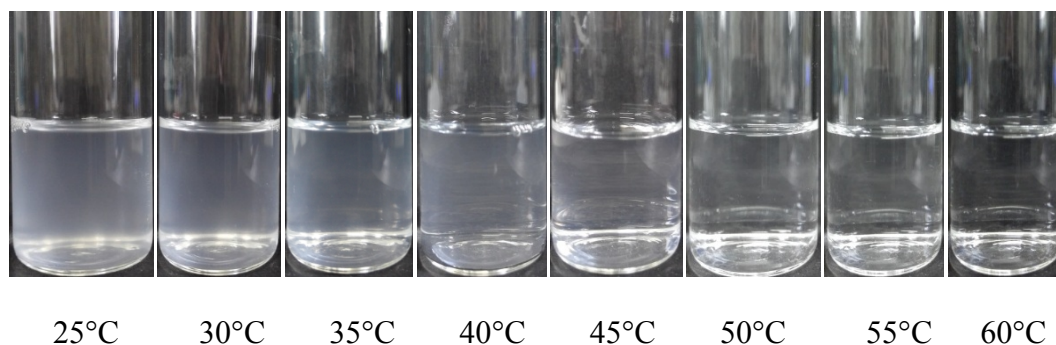

(a)

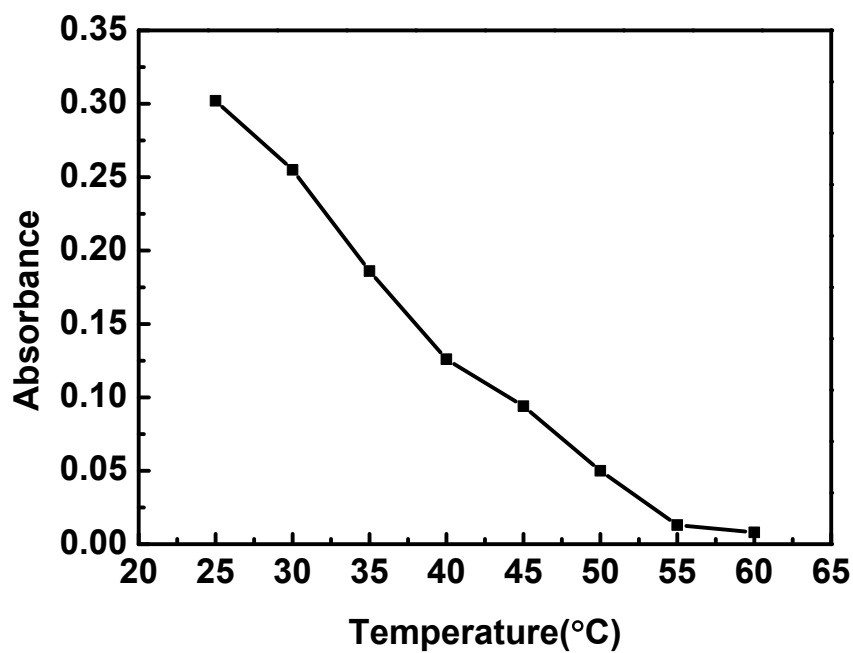

(b)

**Figure S1.** (a) Photographs and (b) UV absorbance of the variation in DDAB/TTAC ( $x_{\text{DDAB}}=0.5$ ,  $c_{\text{total}}=0.030$  M) aqueous solutions with different temperature.

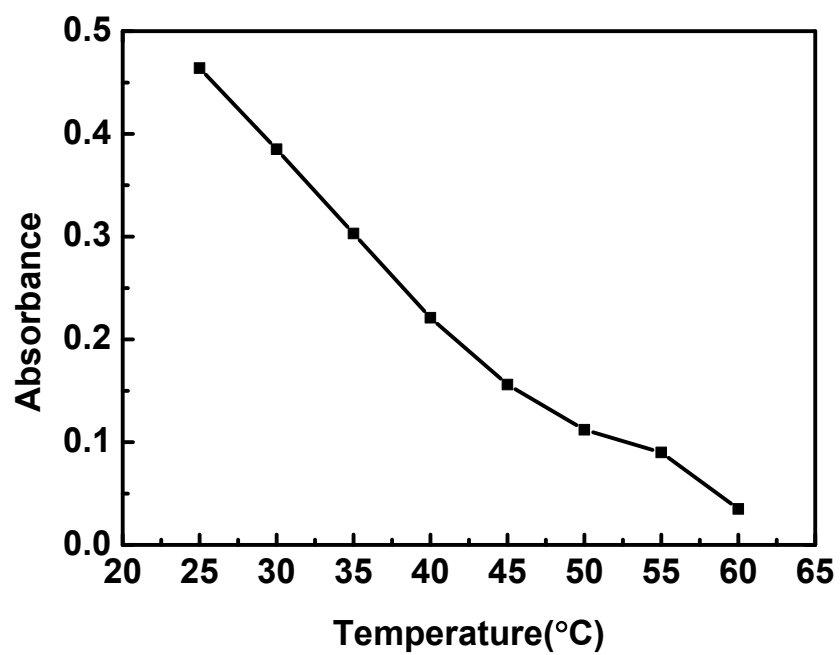

**Figure S2.** UV absorbance of the variation in DDAB/HTAC ( $x_{\text{DDAB}}=0.45$ ,  $c_{\text{total}}=0.030$

M) aqueous solutions with different temperature.
